# Supplementary material
Source: publisher figshare collection journal article supplement (https://karger.figshare.com/ndownloader/files/14016023)
Supplement: Supplementary file 1 [file 14016023]

**Supplemental Table**. Baseline Characteristics and Bivariate Associations with Openness (n=875)

|  | **Openness** | | | **Association with Openness** (continuous score) |
| --- | --- | --- | --- | --- |
| Mean (SD) or % | > 1 SD Below Mean | Mean  ± 1 SD | > 1 SD  Above Mean | *p* |
| Age, *years* | 75.2 (2.7) | 75.2 (2.8) | 75.3 (2.6) | 0.54 |
| Female | 43.8 | 50.8 | 55.0 | 0.04* |
| Black | 49.3 | 50.0 | 32.1 | <0.001* |
| Education |  |  |  |  |
| *< High School* | 35.6 | 20.6 | 4.6 | <0.001* |
| *HS / Some College* | 54.1 | 52.2 | 40.0 |  |
| *> Bachelor’s Degree* | 10.3 | 27.2 | 55.4 |  |
| Literacy, ≥ *9th grade* | 63.7 | 74.4 | 91.6 | <0.001* |
| Hypertension | 77.4 | 71.1 | 63.4 | 0.007* |
| Myocardial Infarction | 21.2 | 15.2 | 12.2 | 0.02* |
| Diabetes | 19.9 | 20.3 | 14.5 | 0.04* |
| Stroke / Transient Ischemic Attack | 10.3 | 8.3 | 3.8 | 0.06 |
| Obesity | 23.6 | 23.4 | 16.8 | 0.11 |
| Current Smoker | 6.2 | 6.0 | 3.8 | 0.87 |
| APOE e4 Carrier | 27.0 | 29.1 | 33.6 | 0.46 |
| Depressive Symptoms (CES-D-10, out of 20) | 4.3 (3.7) | 4.0 (3.8) | 3.6 (3.6) | 0.02* |
